# Supplementary material for: Statin treatment and LDL-cholesterol treatment goal attainment among individuals with familial hypercholesterolaemia in primary care
Source: HighWire-hosted journal article supplement (doi:10.1136/openhrt-2021-001817), 2021-10-01
Supplement: openhrt-2021-001817supp001_data_supplement.pdf [file openhrt-2021-001817supp001_data_supplement.pdf]

## Supplementary Tables

**Supplementary table 1.** Lipid-lowering treatment among individuals with FH in UK Primary Care (n=8,234) \*

|                                         |       | Baseline      | 12 months     | 24 months     |
|-----------------------------------------|-------|---------------|---------------|---------------|
| <b>Type of lipid-lowering treatment</b> |       |               |               |               |
| Statins                                 |       | 8,137 (98.82) | 5,944 (72.19) | 5,341 (64.87) |
| Ezetimibe + Statins                     | n (%) | 4 (0.05)      | 8 (0.10)      | 13 (0.16)     |
| Fibrates                                |       | -             | 87 (1.06)     | 115 (1.40)    |
| Lipid-regulating drugs (Ezetimibe)      |       | -             | 258 (3.13)    | 329 (4.00)    |
| Unknown                                 |       | 93 (1.13)     | 1,937 (23.53) | 2,436 (25.59) |

\*Table shows data from analyses of individuals with FH prior to applying study eligibility criteria

**Supplementary table 2.** Attainment of European Society of Cardiology/ European Atherosclerosis Society (ESC/EAS) guideline of 50% LDL-C reduction and LDL-C <1.8mmol/L

| EAS treatment goal attainment in study population                         |       | 12 months     | 24 months     |
|---------------------------------------------------------------------------|-------|---------------|---------------|
| <b>Goal attainment in entire study cohort</b>                             |       | (n=3,064)     | (n=1,662)     |
| Attained 50% LDL-C & LDL-C <1.8mmol/l                                     | n (%) | 139 (4.5)     | 81 (4.87)     |
| Goal not attained                                                         |       | 2,925 (95.46) | 1,581 (95.13) |
| <b>Goal attainment in FH cohort with baseline LDL<math>\geq</math>7.5</b> |       | (n=1,805)     | (n=982)       |
| Attained 50% LDL-C & LDL-C <1.8mmol/l                                     | (%)   | 51 (2.83)     | 36 (3.67)     |
| Goal not attained                                                         |       | 1,754 (97.17) | 946 (96.33)   |
